# Supplementary material for: Patterns and controlling factors of soil carbon sequestration in nitrogen-limited and -rich forests in China—a meta-analysis
Source: PeerJ journal article supplement (doi:10.7717/peerj.14694), 2023-01-18

1  
2  
3  
4  
5  
6  
7  
8  
9  
10  
11  
12  
13  
14  
15  
16  
17  
18

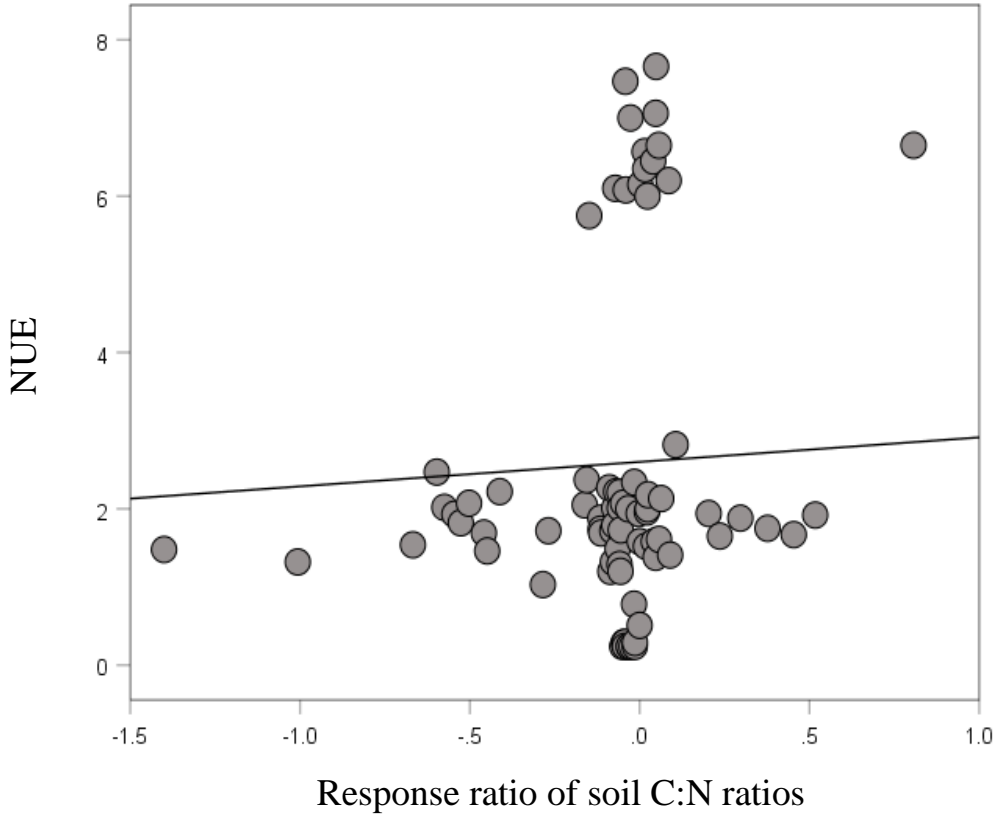

Supplement: Figure_S2.pdf [file Figure_S2.pdf]
