# Supplementary material for: Patterns and controlling factors of soil carbon sequestration in nitrogen-limited and -rich forests in China—a meta-analysis
Source: PeerJ journal article supplement (doi:10.7717/peerj.14694), 2023-01-18
Supplement: Figure_S4.pdf [file Figure_S4.pdf]

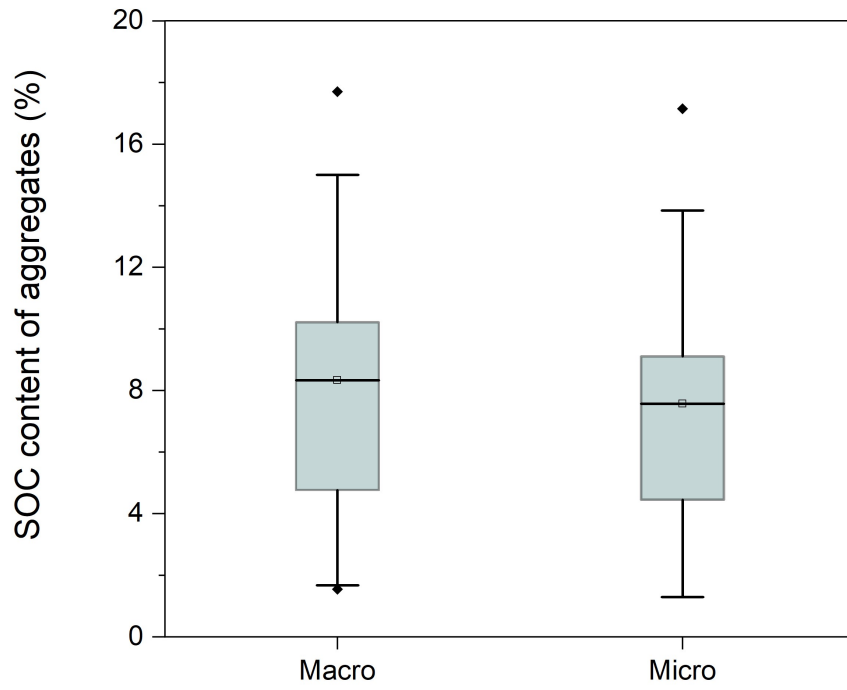

55

56

57

58
