# Supplementary material for: Patterns and controlling factors of soil carbon sequestration in nitrogen-limited and -rich forests in China—a meta-analysis
Source: PeerJ journal article supplement (doi:10.7717/peerj.14694), 2023-01-18

59

60

61

62

63

64

65

66

67

68

69

70

71

72

73

74

75

76

77

78

79

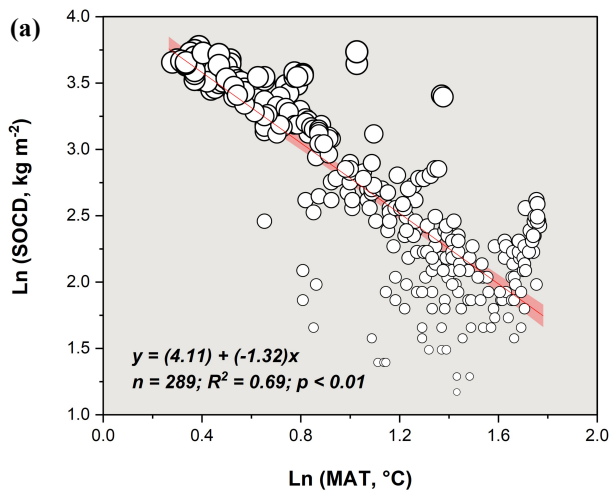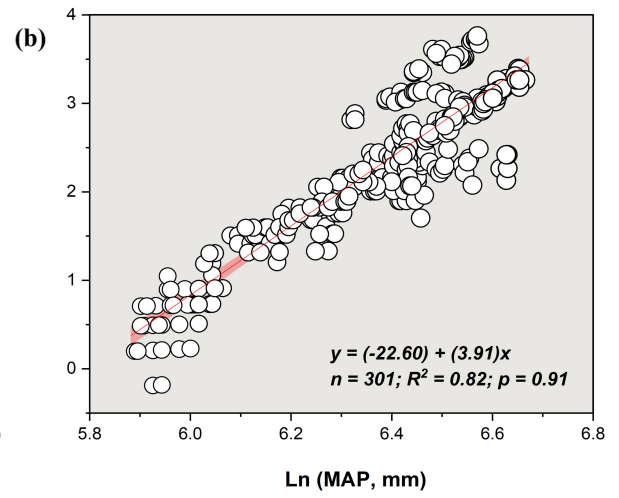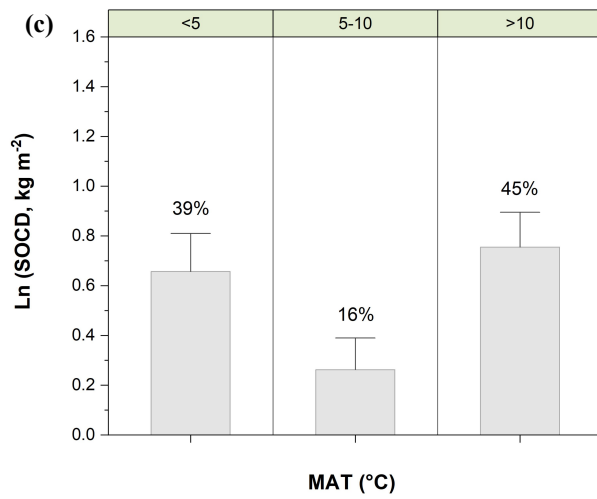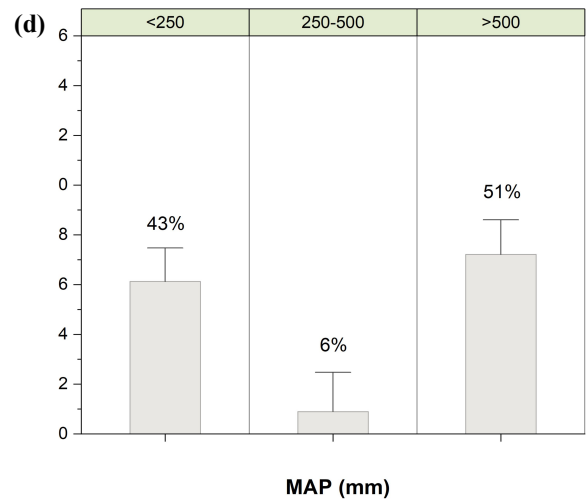

Supplement: Figure_S5.pdf [file Figure_S5.pdf]
